# Supplementary material
Source: PubMed Central journal article supplement (PMC3049952)

## Inhibited Temperament

### Left Amygdala

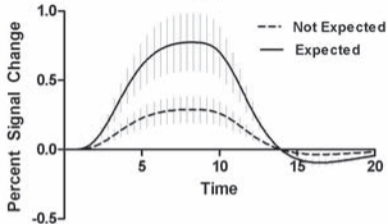

### Right Amygdala

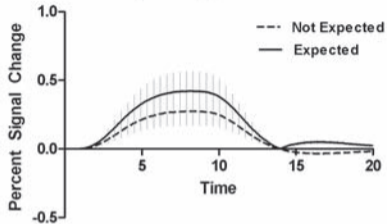

## Uninhibited Temperament

### Left Amygdala

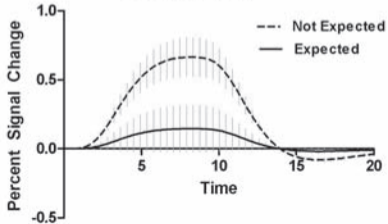

### Right Amygdala

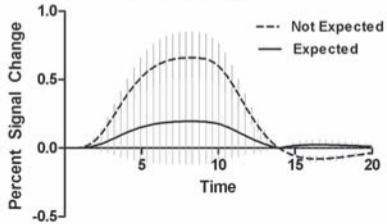

Supplement: NIHMS269332-supplement-1.pdf [file NIHMS269332-supplement-1.pdf]
